# Supplementary material
Source: PubMed Central journal article supplement (PMC11059968)
Supplement: NIHMS1980728-supplement-1.pdf [file NIHMS1980728-supplement-1.pdf]

## **Supplementary Information Guide**

- Supplementary Table 1: Clinical profiles of study participants
- Supplementary Table 2: Adverse events
- Supplementary Table 3: List of top 25 HIV-specific clonotypes with respect to their time dependence across Weeks 0, 16, and 24
- Supplementary Table 4: List of TRBV-TRBJ gene pairs in the HIV-specific clonotypes with time dependence across Weeks 0, 16, and 24
- Supplementary Table 5: Antibodies used for T cell phenotyping and intracellular cytokine staining
- Supplementary Figure 1: Gating strategy for flow cytometry analysis

**Supplementary Table 1: Clinical profiles of Study Participants**

| Group            | Participant ID | Age | Gender | Race           | HIV Risk | Reported Seroconversion Illness? | ART regimen at study entry | HLA Alleles                                                     | CD4 Count (cells/mm <sup>3</sup> ) |         |                | Plasma viremia (copies/ml) |                |
|------------------|----------------|-----|--------|----------------|----------|----------------------------------|----------------------------|-----------------------------------------------------------------|------------------------------------|---------|----------------|----------------------------|----------------|
|                  |                |     |        |                |          |                                  |                            |                                                                 | Reported Nadir                     | Pre-ART | At study entry | Pre-ART                    | At study entry |
| Group 1: bNAb    | 01             | 45  | Male   | White          | MSM      | Yes                              | EVG/Cobi/TAF/FTC           | A 03,24; B 07; DRB1 04,15; CW 07; DQB1AS 02, 04                 | 520                                | 520     | 1177           | 23,805                     | <40            |
|                  | 02             | 40  | Male   | Black          | MSM      | No                               | ABC/3TC/DTG                | A 01,30; B 08,57; DQ 02,06; DRB1 03,13; CW 07,18; DQB1AS 02, 06 | 648                                | 673     | 911            | 20663                      | <40            |
|                  | 05             | 27  | Male   | Asian          | MSM      | Yes                              | EVG/Cobi/TAF/FTC/ DRV/ RPV | A 24,31; B 35,51; DRB1 09,14; CW 03,14; DQB1AS 03, 04           | 460                                | 630     | 543            | 469,000                    | <40            |
|                  | 06             | 40  | Male   | White          | MSM      | Yes                              | ABC/3TC/DTG                | A 24,31; B 08,35; DRB1 01,03; CW 04,07; DQB1AS 02, 05           | 483                                | 483     | 799            | 3,600,000                  | <40            |
|                  | 08             | 57  | Male   | White          | MSM      | Yes                              | EVG/Cobi/TAF/FTC           | A 11,24; B 35,38; DRB1 07,13; CW04,12; DQB1AS 02, 06            | 500                                | -       | 598            | 140000                     | <40            |
|                  | 13             | 38  | Male   | White/Hispanic | MSM      | Yes                              | DTG/ABC/3TC                | A 30,68; B42,48; DRB1 04,11; CW 08,17; DQB1AS 03, 03            | 619                                | 619     | 919            | 99,596                     | <40            |
|                  | 14             | 39  | Male   | White          | MSM      | No                               | EVG/Cobi/TAF/FTC           | A 26,32; B 07,57; DRB1 07,08; CW 06,07; DQB1AS 03, 04           | 430                                | -       | 661            | 322                        | <40            |
| Group 1: Placebo | 03             | 32  | Male   | White          | MSM      | Yes                              | TAF/FTC/DTG                | A1; B37,57; DRB1 07,15; CW06; DQB1AS 03, 06                     | 280                                | 360     | 596            | 131,215                    | <40            |
|                  | 04             | 33  | Male   | White          | MSM      | No                               | DTG/ABC/3TC                | A 24,33; B 14,37; DRB1 01,08; CW 06,08; DQB1AS 04, 05           | 330                                | 560     | 809            | 30,186                     | <40            |
|                  | 07             | 56  | Male   | White          | MSM      | No                               | EVG/Cobi/TAF/FTC           | A 02,24; B 40,44; DRB1 08,15; CW 03,05; DQB1AS 04, 06           | 475                                | 475     | 612            | 82,132                     | <40            |
|                  | 09             | 41  | Male   | White          | MSM      | No                               | DTG/ABC/3TC                | A 02,26; B 35,50; DRB1 03,08; CW 04,06; DQB1AS 02, 04           | 296                                | 296     | 832            | 100,400                    | <40            |
|                  | 10             | 52  | Male   | White          | MSM      | Yes                              | DTG/ABC/3TC                | A 24; B 07,15; DRB1 04,15; CW 03,07; DQB1AS 03, 06              | 552                                | 592     | 552            | 1,322,739                  | <40            |
|                  | 11             | 34  | Male   | White/Hispanic | MSM      | Yes                              | DTG/ABC/3TC                | A 02,26; B 35,40; DRB1 11,16; CW 03,15; DQB1AS 03               | 506                                | 506     | 762            | 16,197                     | <40            |
|                  | 12             | 29  | Male   | Asian          | MSM      | Yes                              | EVG/Cobi/TAF/FTC           | A 24,33; B 48,58; DRB1 11,13; CW 03,08; DQB1AS 03, 06           | 215                                | 300     | 426            | 2,072                      | <40            |
| Group 2          | S1             | 35  | Male   | White          | MSM      | No                               | -                          | A 01,02; B 08,14; CW 07,08                                      | 371                                | -       | 527            | -                          | 2,984          |
|                  | S2             | 44  | Male   | Multiple Race  | MSM      | No                               | -                          | A11,31; B7,52; CW07,12                                          | 575                                | -       | 610            | -                          | 493            |
|                  | S3             | 40  | Male   | White          | MSM      | No                               | -                          | A3,26; B51,57; CW07,15                                          | 406                                | -       | 851            | -                          | 473            |
|                  | S4             | 52  | Male   | White          | MSM      | No                               | -                          | A1,3; B8,57; DQ 02; DRB1 03; CW 06,07                           | 590                                | -       | 1011           | -                          | 825            |
|                  | S5             | 52  | Male   | Black          | MSM      | No                               | -                          | A3,26; B7,45; DQ 0202; DRB1 07,11; CW 06, 07                    | 280                                | -       | 640            | -                          | 147            |

ABC: Abacavir, AZT: Zidovudine, APV: Amprenavir, Cobi: Cobistat, DRV: Darunavir, DTG: Douletegravir, ETV: Etravirine, EVG: Elvitegravir, FTC: Emtricitabine, LPV/r: Loprinavir/ritonavir, MVC: Maraviroc, RAL: Raltegravir, RTV: Rilonavir, TAF: Tenofovir Alafenamide, TDF: Tenofovir, T20: Entuvirtide, 3TC: Lamivudine  
MSM: Men who have sex with men, ART: Antiretroviral Therapy

**Supplementary Table 2: Adverse events**

| <b>Adverse Events<sup>a</sup></b> | <b>3BNC117/10-1074<sup>b</sup></b> | <b>Placebo</b> |
|-----------------------------------|------------------------------------|----------------|
| <b>Infusion-related</b>           |                                    |                |
| Rigors                            | 1                                  | 0              |
| Chills                            | 1                                  | 0              |
| Fever                             | 1                                  | 0              |
| Headache                          | 0                                  | 1              |

<sup>a</sup>All adverse events were grade 1-2.

<sup>b</sup>Includes both Group 1 and 2 study participants.

**Supplementary Table 3: List of top 25 HIV-specific clonotypes with respect to their time dependence across Weeks 0, 16, and 24**

| Group     | CDR3           | Time 1 | Time 2 | P value     | Week 0      | Week 16     | Week 24     |
|-----------|----------------|--------|--------|-------------|-------------|-------------|-------------|
| 1 bNAbs   | CASSPGTSSYEQYF | Wk0    | Wk16   | 0.0625      | 1.14877E-05 | 1.5358E-06  | 5.70861E-06 |
| 1 bNAbs   | CASSWDSNYGYTF  | Wk0    | Wk24   | 0.0625      | 0           | 3.9E-06     | 7.894E-06   |
| 1 bNAbs   | CASSEGGYGYTF   | Wk0    | Wk16   | 0.100348246 | 6.05556E-06 | 1.5358E-06  | 5.28858E-07 |
| 1 bNAbs   | CASSEGGYGYTF   | Wk0    | Wk24   | 0.100348246 | 6.05556E-06 | 1.5358E-06  | 5.28858E-07 |
| 1 bNAbs   | CASSLAGGYTF    | Wk0    | Wk24   | 0.100348246 | 1.7457E-06  | 1.95E-06    | 5.5844E-06  |
| 1 bNAbs   | CASSLGTGGNQPHF | Wk0    | Wk16   | 0.100348246 | 9.27845E-06 | 5.72361E-06 | 1.64822E-05 |
| 1 bNAbs   | CASSLGTGGNQPHF | Wk0    | Wk24   | 0.100348246 | 9.27845E-06 | 5.72361E-06 | 1.64822E-05 |
| 1 bNAbs   | CASSLGTGGNQPHF | Wk16   | Wk24   | 0.100348246 | 9.27845E-06 | 5.72361E-06 | 1.64822E-05 |
| 1 bNAbs   | CASSLRGTGELFF  | Wk0    | Wk24   | 0.100348246 | 5.30116E-06 | 8.46043E-06 | 1.35042E-05 |
| 1 bNAbs   | CASSQGTGSTDQYF | Wk0    | Wk16   | 0.100348246 | 1.87382E-06 | 5.2561E-06  | 8.06653E-07 |
| 1 bNAbs   | CASSQGTGSTDQYF | Wk16   | Wk24   | 0.100348246 | 1.87382E-06 | 5.2561E-06  | 8.06653E-07 |
| 1 bNAbs   | CASSYTGELFF    | Wk16   | Wk24   | 0.100348246 | 6.65316E-06 | 0           | 5.5844E-06  |
| 1 bNAbs   | CASSYTGELFF    | Wk0    | Wk16   | 0.100348246 | 6.65316E-06 | 0           | 5.5844E-06  |
| 1 bNAbs   | CASSVGTGELFF   | Wk0    | Wk16   | 0.100348246 | 1.02826E-05 | 4.14083E-06 | 3.92846E-06 |
| 2         | CASSGQGYGYTF   | Wk16   | Wk24   | 0.100348246 | 1.82715E-05 | 1.47503E-05 | 6.70228E-06 |
| 2         | CASSGYGYTF     | Wk0    | Wk16   | 0.100348246 | 6.79655E-07 | 3.44938E-06 | 1.36023E-06 |
| 2         | CASSLAGGQETQYF | Wk0    | Wk16   | 0.100348246 | 4.93018E-07 | 4.25397E-06 | 2.12393E-06 |
| 2         | CASSLAGGQETQYF | Wk16   | Wk24   | 0.100348246 | 4.93018E-07 | 4.25397E-06 | 2.12393E-06 |
| 2         | CASSLGASYEQYF  | Wk0    | Wk16   | 0.100348246 | 1.28899E-05 | 1.96881E-05 | 1.3584E-05  |
| 2         | CASSLGGDEQYF   | Wk16   | Wk24   | 0.100348246 | 6.68145E-06 | 1.15355E-05 | 3.56137E-06 |
| 2         | CASSLGYTEAFF   | Wk16   | Wk24   | 0.100348246 | 7.7168E-06  | 4.39176E-06 | 1.18918E-05 |
| 2         | CASSVGTGELFF   | Wk0    | Wk16   | 0.100348246 | 4.67035E-06 | 9.39099E-07 | 0           |
| 2         | CASSVGTGELFF   | Wk0    | Wk24   | 0.100348246 | 4.67035E-06 | 9.39099E-07 | 0           |
| 1 bNAbs   | CASRDSSYEQYF   | Wk0    | Wk24   | 0.125       | 2.76546E-06 | 9.74628E-06 | 4.47859E-06 |
| 1 bNAbs   | CASSPGTSSYEQYF | Wk0    | Wk24   | 0.125       | 1.14877E-05 | 1.5358E-06  | 5.70861E-06 |
| 1 bNAbs   | CASSEGAYEQYF   | Wk0    | Wk16   | 0.181449208 | 3.28413E-06 | 0           | 0           |
| 1 bNAbs   | CASSEGAYEQYF   | Wk0    | Wk24   | 0.181449208 | 3.28413E-06 | 0           | 0           |
| 1 bNAbs   | CASSLDRNEQFF   | Wk0    | Wk16   | 0.181449208 | 5.1699E-06  | 2.41685E-06 | 1.1545E-06  |
| 1 bNAbs   | CASSLDRNEQFF   | Wk0    | Wk24   | 0.181449208 | 5.1699E-06  | 2.41685E-06 | 1.1545E-06  |
| 1 bNAbs   | CASSLEGGSNQPHF | Wk0    | Wk24   | 0.181449208 | 0           | 8.33802E-07 | 3.4477E-06  |
| 1 bNAbs   | CASSLGEQPQHF   | Wk0    | Wk16   | 0.181449208 | 4.44395E-06 | 1.1162E-06  | 0           |
| 1 bNAbs   | CASSLGEQPQHF   | Wk0    | Wk24   | 0.181449208 | 4.44395E-06 | 1.1162E-06  | 0           |
| 1 bNAbs   | CASSLGPTEAFF   | Wk0    | Wk16   | 0.181449208 | 3.7724E-06  | 1.95E-06    | 3.89558E-06 |
| 1 bNAbs   | CASSLGRGQETQYF | Wk0    | Wk16   | 0.181449208 | 0           | 3.92316E-06 | 3.01887E-06 |
| 2         | CASSGTDYGYTF   | Wk0    | Wk24   | 0.181449208 | 4.13776E-06 | 3.7564E-06  | 5.93562E-07 |
| 2         | CASSLAGTQETQYF | Wk0    | Wk24   | 0.181449208 | 0           | 0           | 2.80404E-06 |
| 2         | CASSLAGTQETQYF | Wk16   | Wk24   | 0.181449208 | 0           | 0           | 2.80404E-06 |
| 2         | CASSLASDTQYF   | Wk16   | Wk24   | 0.181449208 | 1.50342E-05 | 1.81239E-05 | 1.27748E-05 |
| 2         | CASSLETANTEAFF | Wk0    | Wk16   | 0.181449208 | 8.18635E-07 | 2.59652E-06 | 9.03546E-07 |
| 2         | CASSLETANTEAFF | Wk16   | Wk24   | 0.181449208 | 8.18635E-07 | 2.59652E-06 | 9.03546E-07 |
| 2         | CASSLGADQPQHF  | Wk0    | Wk24   | 0.181449208 | 1.89882E-05 | 1.76452E-05 | 5.42128E-06 |
| 2         | CASSLGASSYEQYF | Wk0    | Wk24   | 0.181449208 | 4.16925E-06 | 4.33472E-06 | 1.18712E-06 |
| 2         | CASSLGGGYTF    | Wk0    | Wk24   | 0.181449208 | 2.77258E-06 | 1.96057E-06 | 0           |
| 2         | CASSLGPTEAFF   | Wk0    | Wk16   | 0.181449208 | 3.0982E-06  | 0           | 9.01766E-07 |
| 2         | CASSLGTSSYEQYF | Wk0    | Wk16   | 0.181449208 | 5.7421E-06  | 8.92435E-07 | 5.93562E-07 |
| 2         | CASSLGTSSYEQYF | Wk0    | Wk24   | 0.181449208 | 5.7421E-06  | 8.92435E-07 | 5.93562E-07 |
| 2         | CASSLWGNTAEAFF | Wk0    | Wk16   | 0.181449208 | 0           | 3.53014E-06 | 8.5025E-07  |
| 2         | CASSLWGNTAEAFF | Wk16   | Wk24   | 0.181449208 | 0           | 3.53014E-06 | 8.5025E-07  |
| 2         | CASSLRGETQYF   | Wk0    | Wk16   | 0.181449208 | 4.93018E-07 | 2.42243E-06 | 0           |
| 2         | CASSLRGETQYF   | Wk16   | Wk24   | 0.181449208 | 4.93018E-07 | 2.42243E-06 | 0           |
| 1 Placebo | CASSGTNYGYTF   | Wk0    | Wk16   | 0.220671362 | 0           | 8.69508E-06 | 4.29155E-06 |
| 1 Placebo | CASSLDGNTGELFF | Wk0    | Wk16   | 0.220671362 | 0           | 3.57672E-06 | 0           |
| 1 Placebo | CASSLEGGSNQPHF | Wk0    | Wk16   | 0.220671362 | 0           | 5.28284E-06 | 4.29155E-06 |
| 1 Placebo | CASSPGTSTYEQYF | Wk0    | Wk16   | 0.220671362 | 7.08385E-06 | 0           | 0           |
| 1 Placebo | CASSTNNEOFF    | Wk0    | Wk16   | 0.220671362 | 0           | 3.57672E-06 | 0           |
| 1 Placebo | CASTGSYGYTF    | Wk0    | Wk16   | 0.220671362 | 4.89773E-06 | 0           | 0           |
| 1 Placebo | CATSDSYEQYF    | Wk0    | Wk16   | 0.220671362 | 7.60935E-06 | 0           | 0           |
| 1 Placebo | CASSDTGELFF    | Wk0    | Wk16   | 0.333333333 | 1.46932E-05 | 6.98896E-06 | 1.71662E-05 |
| 1 Placebo | CASSEGGYGYTF   | Wk0    | Wk16   | 0.333333333 | 4.89773E-06 | 1.87061E-06 | 0           |
| 1 Placebo | CASSISYEQYF    | Wk0    | Wk16   | 0.333333333 | 7.08385E-06 | 3.57672E-06 | 0           |
| 1 Placebo | CASSLGASYEQYF  | Wk0    | Wk16   | 0.333333333 | 1.79303E-05 | 3.57672E-06 | 4.29155E-06 |
| 1 Placebo | CASSLGTSAEQYF  | Wk0    | Wk16   | 0.333333333 | 4.89773E-06 | 3.57672E-06 | 0           |
| 1 Placebo | CASSLRGETQYF   | Wk0    | Wk16   | 0.333333333 | 7.08385E-06 | 1.87061E-06 | 0           |
| 1 Placebo | CASSLYGQYF     | Wk0    | Wk16   | 0.333333333 | 9.79546E-06 | 3.57672E-06 | 0           |
| 1 Placebo | CASSPGGGELFF   | Wk0    | Wk16   | 0.333333333 | 9.26996E-06 | 1.87061E-06 | 0           |
| 1 Placebo | CASSYRTGELFF   | Wk0    | Wk16   | 0.333333333 | 7.08385E-06 | 1.87061E-06 | 0           |
| 1 Placebo | CASSFDREAFF    | Wk0    | Wk24   | 0.479500122 | 0           | 0           | 4.29155E-06 |
| 1 Placebo | CASSFDREAFF    | Wk16   | Wk24   | 0.479500122 | 0           | 0           | 4.29155E-06 |
| 1 Placebo | CASSGMNTEAFF   | Wk16   | Wk24   | 0.479500122 | 5.42323E-06 | 0           | 4.29155E-06 |
| 1 Placebo | CASSGQSYGYTF   | Wk0    | Wk24   | 0.479500122 | 0           | 3.74121E-06 | 4.29155E-06 |
| 1 Placebo | CASSGTAYGYTF   | Wk0    | Wk24   | 0.479500122 | 0           | 0           | 4.29155E-06 |
| 1 Placebo | CASSGTAYGYTF   | Wk16   | Wk24   | 0.479500122 | 0           | 0           | 4.29155E-06 |
| 1 Placebo | CASSGTDYGYTF   | Wk16   | Wk24   | 0.479500122 | 2.71161E-06 | 0           | 4.29155E-06 |
| 1 Placebo | CASSGTNYGYTF   | Wk0    | Wk24   | 0.479500122 | 0           | 8.69508E-06 | 4.29155E-06 |
| 1 Placebo | CASSHGDIYEQYF  | Wk16   | Wk24   | 0.479500122 | 2.18612E-06 | 0           | 4.29155E-06 |

For the bNAbs arm of Group 1 and Group 2, P values were determined using the two-sided Wilcoxon signed rank test.

For the placebo arm of group 1, P values were determined using two-sided Wilcoxon rank sum (Mann-Whitney).

The reported P values have not been adjusted for multiple comparisons.



**Supplementary Table 5: Antibodies used for T cell phenotyping and intracellular cytokine staining**

| Antibody | Fluorophore      | Clone    | Vendor      | Catalog # | Detection     | Assay* | Volume per test ( $\mu$ l)** |
|----------|------------------|----------|-------------|-----------|---------------|--------|------------------------------|
| CCR7     | V450             | 150503   | BD          | 560864    | Surface       | P, ICS | 5                            |
| CD160    | Alexa Fluor 647  | BY55     | BD          | 562362    | Surface       | P, ICS | 3                            |
| CD226    | BV480            | DX11     | BD          | 746405    | Surface       | P, ICS | 5                            |
| CD27     | Alexa Fluor 700  | M-T271   | BD          | 560611    | Surface       | P, ICS | 2                            |
| CD28     | BUV496           | CD28.2   | BD          | 741168    | Surface       | P, ICS | 5                            |
| CD3      | BUV805           | SK7      | BD          | 612894    | Surface       | P, ICS | 2                            |
| CD38     | BB515            | HIT2     | BD          | 564498    | Surface       | P, ICS | 3                            |
| CD4      | BUV395           | M-T477   | BD          | 742738    | Surface       | P, ICS | 0.5                          |
| CD45RA   | PerCP-Cy5.5      | HI100    | BD          | 563429    | Surface       | P, ICS | 0.5                          |
| CD8      | BUV737           | SK1      | BD          | 612755    | Surface       | P, ICS | 2                            |
| CD96     | BV711            | 6F9      | BD          | 563174    | Surface       | P, ICS | 5                            |
| CTLA-4   | PE-Cy5           | BNI3     | BD          | 561717    | Surface       | P, ICS | 10                           |
| CXCR5    | BV510            | RF8B2    | BD          | 563105    | Surface       | P, ICS | 5                            |
| HLA-DR   | Super Bright 436 | LN3      | eBioscience | 62-9956   | Surface       | P, ICS | 1.5                          |
| ICOS     | BV421            | DX29     | BD          | 562901    | Surface       | P      | 3                            |
| OX40     | BV786            | ACT35    | BD          | 743285    | Surface       | P, ICS | 5                            |
| PD-1     | PE-Cy7           | EH12.1   | BD          | 561272    | Surface       | P, ICS | 1.5                          |
| TIGIT    | PE-eFluor 610    | MBSA43   | eBioscience | 61-9500   | Surface       | P, ICS | 5                            |
| 2B4      | PE               | C1.7     | eBioscience | Dec-38    | Surface       | P      | 2                            |
| 2B4      | BV605            | C1.7     | BioLegend   | 329536    | Surface       | ICS    | 3                            |
| 4-1BB    | APC              | 4B4-1    | BioLegend   | 309810    | Surface       | P      | 2                            |
| IFN-g    | APC              | B27      | BD          | 554702    | Intracellular | ICS    | 0.5                          |
| MIP-1b   | PE               | D21-1351 | BD          | 550078    | Intracellular | ICS    | 0.5                          |
| TNF-a    | BV650            | MAb11    | BD          | 563418    | Intracellular | ICS    | 1                            |

\*P: phenotyping, ICS: intracellular cytokine staining

\*\*One test:  $2 \times 10^6$  PBMCs in 100 $\mu$ l staining buffer

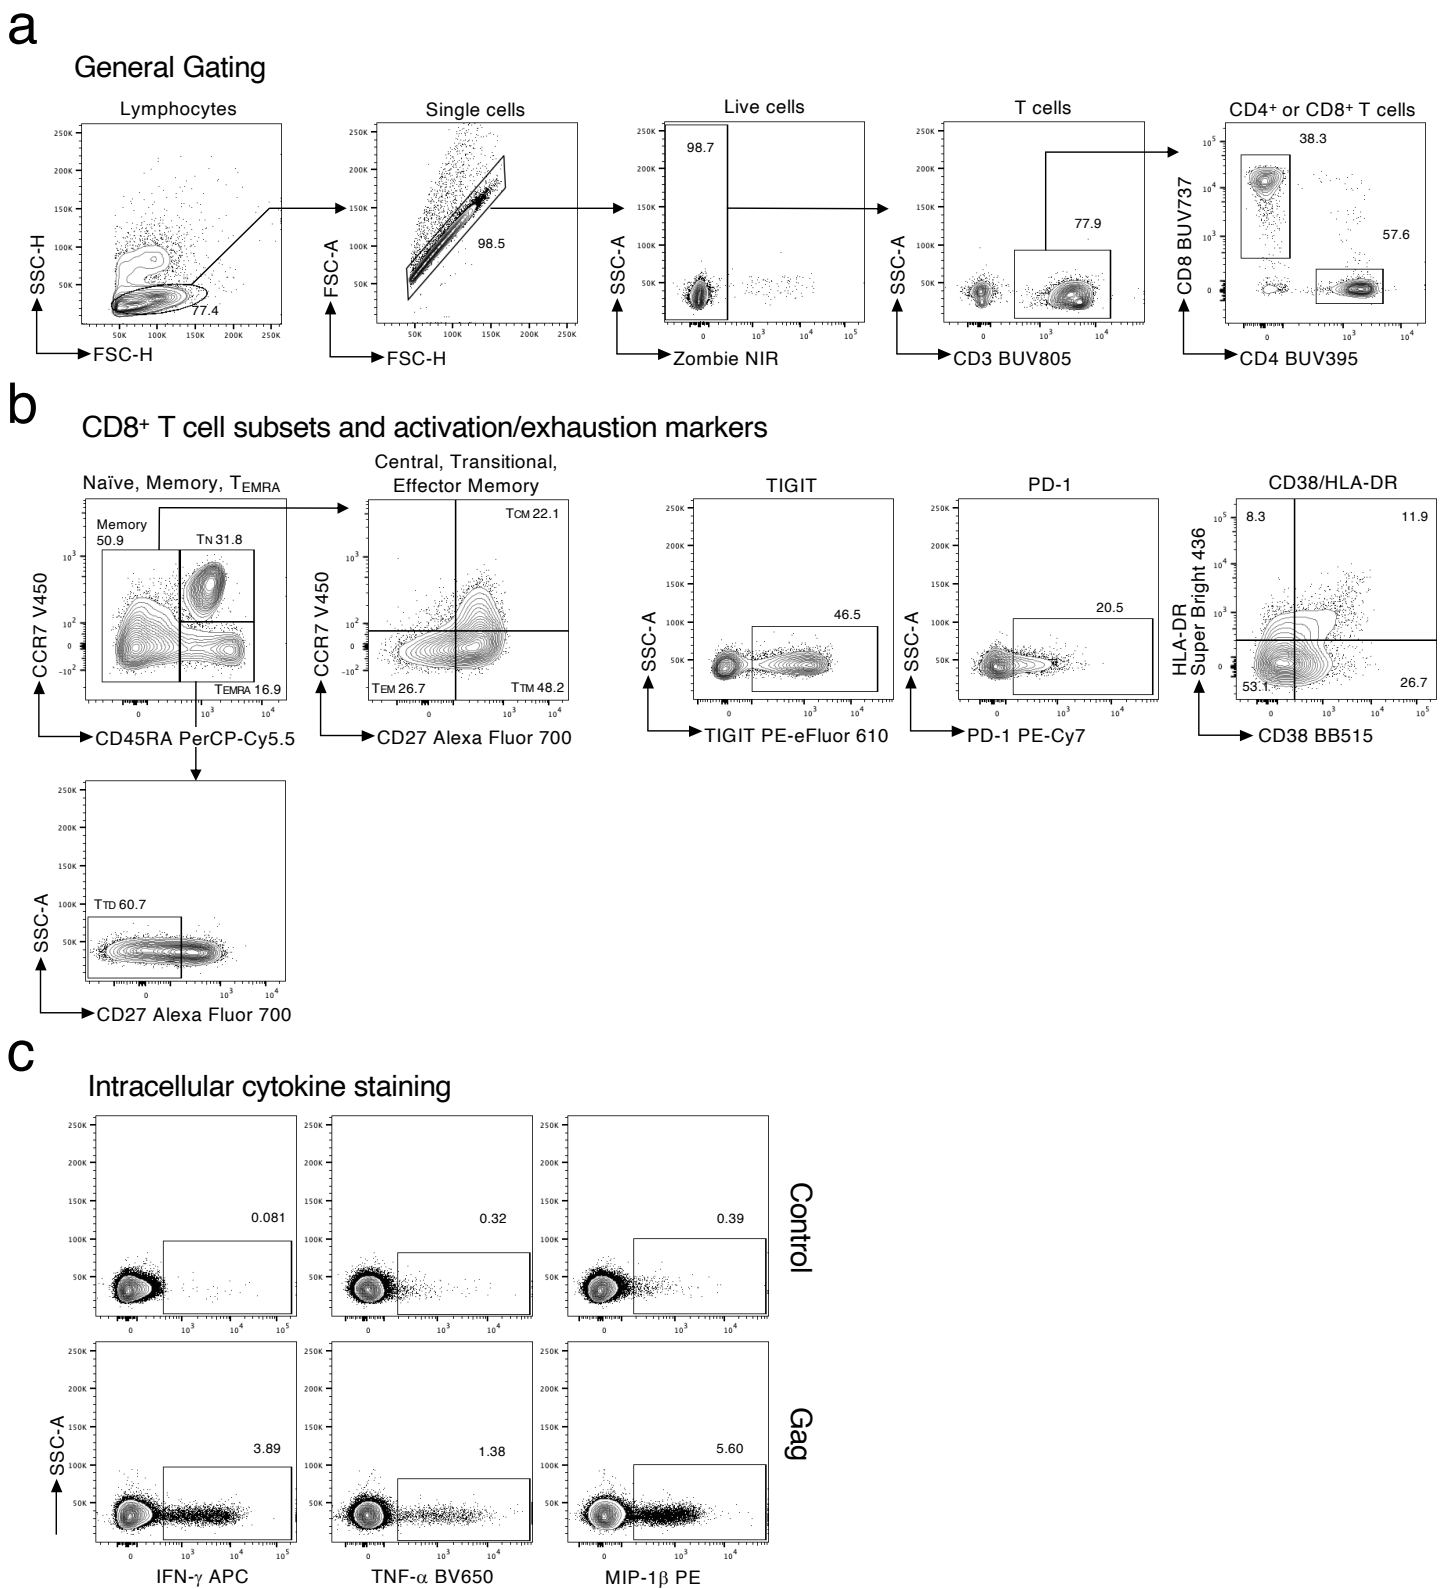

**Supplementary Fig. 1: Gating strategy for flow cytometry analysis**

**a.** General gating strategy to identify CD4<sup>+</sup> and CD8<sup>+</sup> T cells in PBMCs. **b.** Identification of subsets (T<sub>N</sub>, naïve; T<sub>CM</sub>, central memory; T<sub>TM</sub>, transitional memory; T<sub>EM</sub>, effector memory; T<sub>EMRA</sub>, effector memory RA; and T<sub>TD</sub>, terminally differentiated), TIGIT<sup>+</sup>, PD-1<sup>+</sup> and HLA-DR<sup>+</sup>CD38<sup>+</sup> CD8<sup>+</sup> T cells. This gating strategy was used to generate Extended Data Fig. 3b. **c.** Representative plots showing intracellular cytokine staining in unstimulated (Control) or HIV Gag peptide-stimulated (Gag) CD8<sup>+</sup> T cells. The unstimulated cells served as a control for background subtraction. This gating strategy was used to determine the frequency of HIV-specific CD8<sup>+</sup> T cells in Extended Data Fig. 6b.
